# Supplementary material for: Regulation of Adipose Progenitor Cell Expansion in a Novel Micro-Physiological Model of Human Adipose Tissue Mimicking Fibrotic and Pro-Inflammatory Microenvironments
Source: MDPI journal article supplement (doi:10.3390/cells11182798), 2022-09-07
Supplement: s1 [file s1]

## Supplementary information

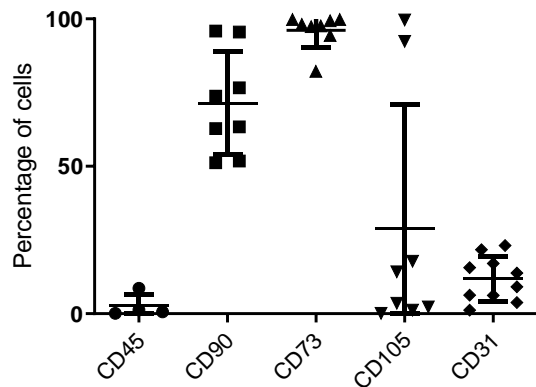

### Supplementary Figure S1: Immunophenotype of adherent cells

ExAdEx models expanded for 2 weeks *in vitro* were digested with collagenase digestion and adherent cells were identified as APCs thanks to their immunophenotype. Cells were fixed with 4% paraformaldehyde for 15 min then stained for FACS analysis with CD105 (Clone BA5b/FITC; Ozyme, France), CD90 (Clone 1H4/APC; Molecular probe), CD73 (Clone HTF-1/PE; Invitrogen, France), CD31 (Clone WM59/PE; BD Biosciences) or CD45 (Clone HI30/PE; BD Biosciences). The percentage of cells is given. It is interesting to note a percentage of CD31<sup>+</sup> cells, reflecting the maintenance of endothelial cells, and of CD45<sup>+</sup> cells, suggesting the maintenance of some hematopoietic cells, in the ExAdEx model. Detection of CD68 positive cells by confocal microscopy supports this hypothesis (not shown).

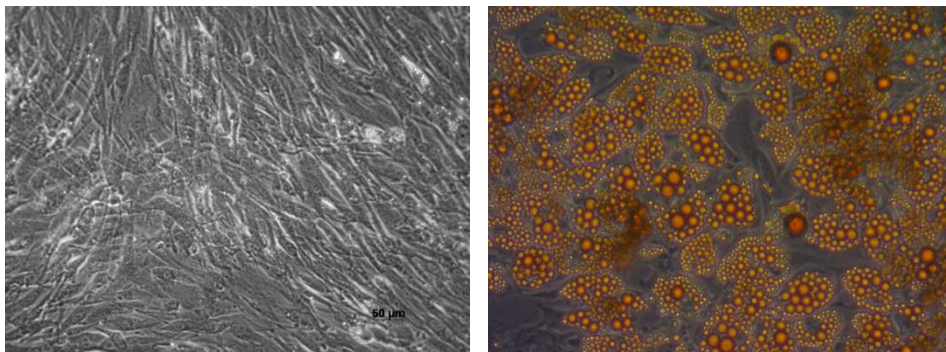

**Supplementary Figure S2:** Adipogenic capacity of adherent cells. Adherent cells were maintained in EGM (Cat: CC-4133; PromoCell, Germany) until they reach cell confluence, and then the medium was supplemented with 1  $\mu$ M Rosiglitazone; 2  $\mu$ M T3; 2,5  $\mu$ g/ml insulin and 250  $\mu$ M Dexaméthasone ; 500

$\mu\text{M}$  IBMX for the first 3 days only for 2 weeks. Then, cells were fixed and stained with Oil Red O for lipid droplets.

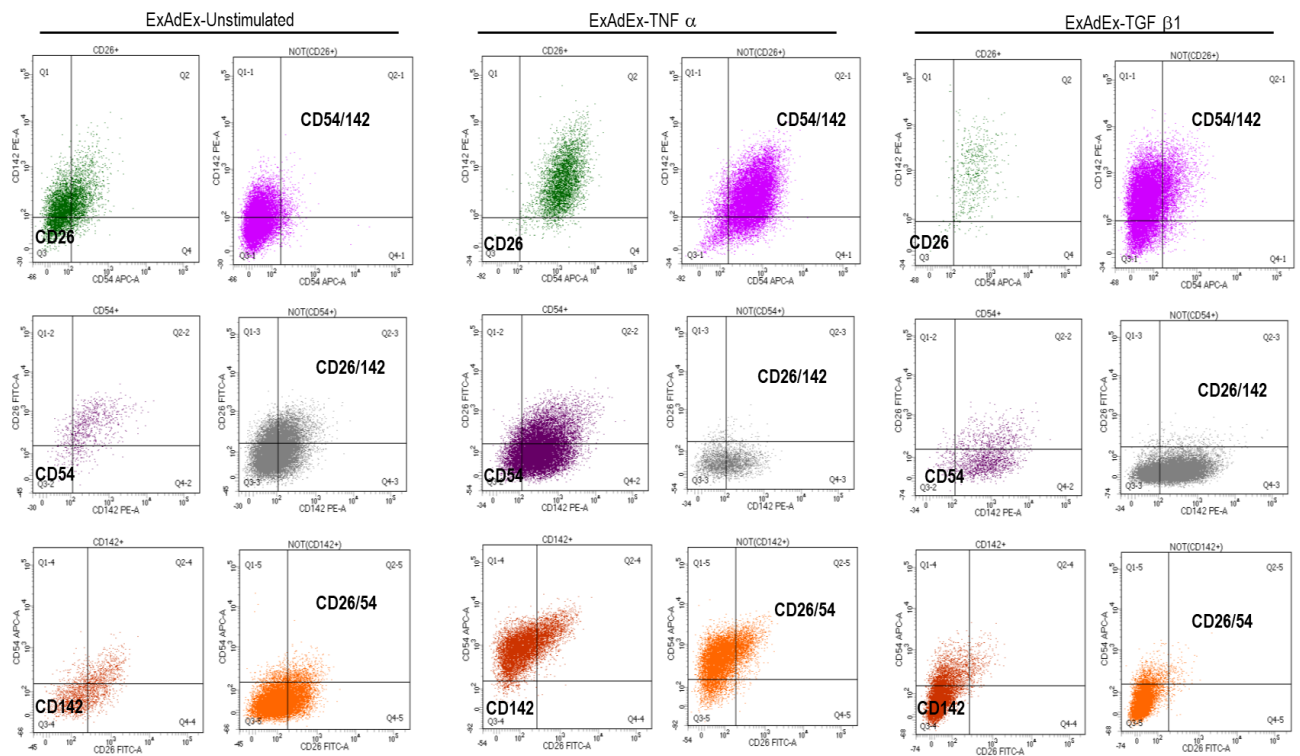

**Supplementary Figure S3:** Gating used to analyse percentages of APC subpopulations in unstimulated, TNF $\alpha$ - and TGF $\beta$ 1-treated ExAdEx models.

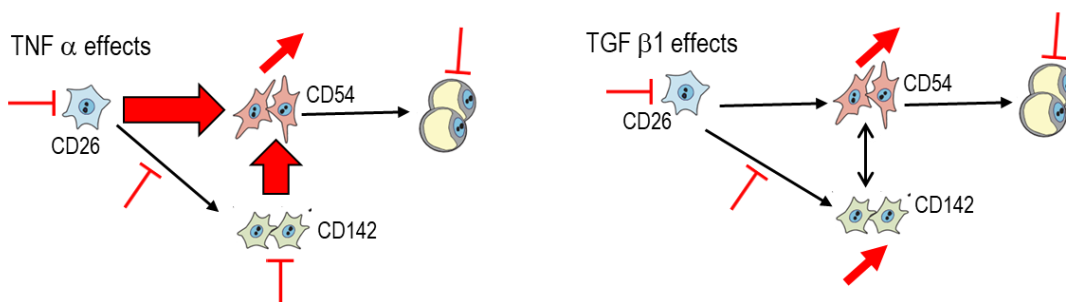

**Supplementary Figure S4:** A schema that summarizes the impacts of inflammatory and fibrotic micro-environments on APC populations.

Table S1

| Target mRNA            | Forward 5'-3'              | Reverse 5'-3'               |
|------------------------|----------------------------|-----------------------------|
| <i>TBP</i>             | ACGCCAGCTTCGGAGAGTTC       | CAAACCGCTTGGGATTATATTC<br>G |
| <i>CD26/DPP4</i>       | SinoBiological HP100649    | SinoBiological HP100649     |
| <i>CD54/ICAM<br/>1</i> | SinoBiological HP100384    | SinoBiological HP100384     |
| <i>MMP14</i>           | CTCTCTTCTGGATGCCCAAT       | ACCTCCGTCTCCTCCTCAGT        |
| <i>INHBA</i>           | GGGAGAACGGGTATGTGGAG<br>AT | GCTGTTCTGACTCGGCAAA         |
| <i>PLIN1</i>           | ACCATCTCCACCCGCCTC         | GATGGGAACGCTGATGCTGT        |
| <i>GLUT4</i>           | CAT TCC TTG GTT CAT CGT G  | ATA GCC TCC GCA ACA TAC     |

Note: Sequences of CD26/DPP4 and CD54/ICAM1 primers purchased at SinoBiological are not available
